# Supplementary material for: Bio-inspired self-healing flexible films with pomegranate-shaped nanosphere loaded graphene for electromagnetic interference shielding and superhydrophobicity performances
Source: Royal Society of Chemistry journal article supplement (doi:10.1039/d2ta05088a), 2022-01-01
Supplement: d2ta05088a1.pdf [file d2ta05088a1.pdf]

## Supporting information

### **Bio-inspired Self-healing Flexible Films with Pomegranate-shaped Nanospheres Loaded Graphene for Electromagnetic Interference Shielding and Superhydrophobicity Performances**

*Jianlin Zhou<sup>a</sup>, Zhonghua Yuan<sup>a</sup>, Han Liu<sup>a</sup>, Weixing He<sup>b</sup>, Kejing Yu<sup>a</sup>, Kunlin Chen<sup>a\*</sup>*

a, Key Laboratory of Eco-Textile, Ministry of Education, School of Textile Science and Engineering, Jiangnan University, Wuxi 214122, China, E-mail:

chenkunlin@jiangnan.edu.cn

b, Jiangsu Textile Research Institute Co. Ltd, Wuxi 214122, China

Keywords: bio-inspired, nanospheres, films, self-healing, EMI shielding

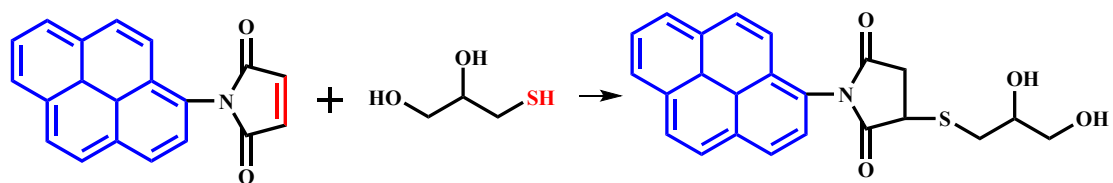

**Fig. S1** The synthetic route of M-NPM

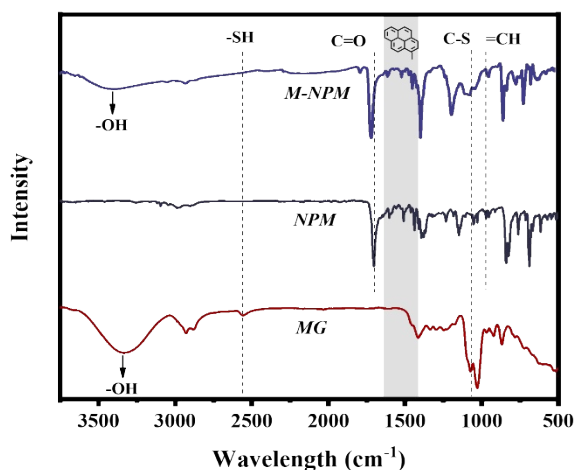

**Fig. S2** FT-IR spectra of MG, NPM and M-NPM

The characteristic peaks (1600cm<sup>-1</sup>, 1508cm<sup>-1</sup> and 1437cm<sup>-1</sup>) of pyrene structure were observed in NPM sample as well as M-NPM sample. The -OH stretching (3400 cm<sup>-1</sup>) and C-S bending (1068 cm<sup>-1</sup>) could be both observed in MG sample and M-NPM sample. Moreover, the absorption peak in 2560 cm<sup>-1</sup> related to -SH of MG and the absorption peak in 967 cm<sup>-1</sup> related to -CH=CH- of NPM were found in M-NPM, illustrating successful preparation of pyrene-containing dihydric alcohol.

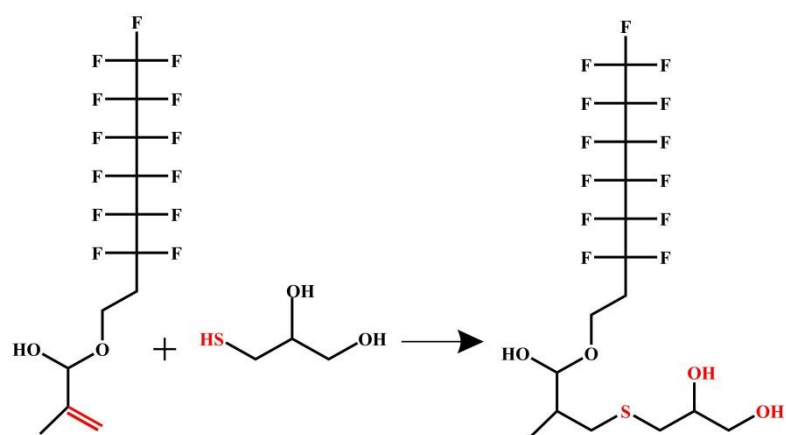

**Fig. S3** The synthetic route of M-PFM

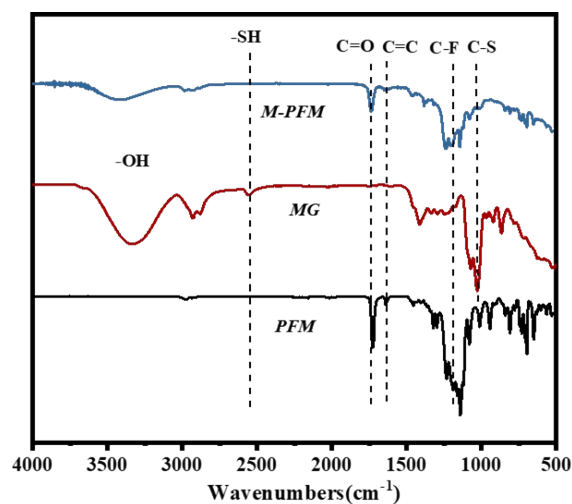

**Fig. S4** FT-IR spectra of MG, PFM and M-PFM

The FT-IR spectra of PFM consisted of three characteristic absorption bands, i.e., C=O ( $1720\text{ cm}^{-1}$ ), C=C ( $1636\text{ cm}^{-1}$ ) and C-F ( $1195\text{ cm}^{-1}$ ). For M-PFM, the absorption bands of  $3400\text{ cm}^{-1}$  (-OH) and  $1037\text{ cm}^{-1}$  (C-S) pertained to the monothioglycerol (MG), and the disappearance of absorption band derived to C=C clearly demonstrated that the MG successfully reacted with PFM via thiol-ene click chemistry reaction.

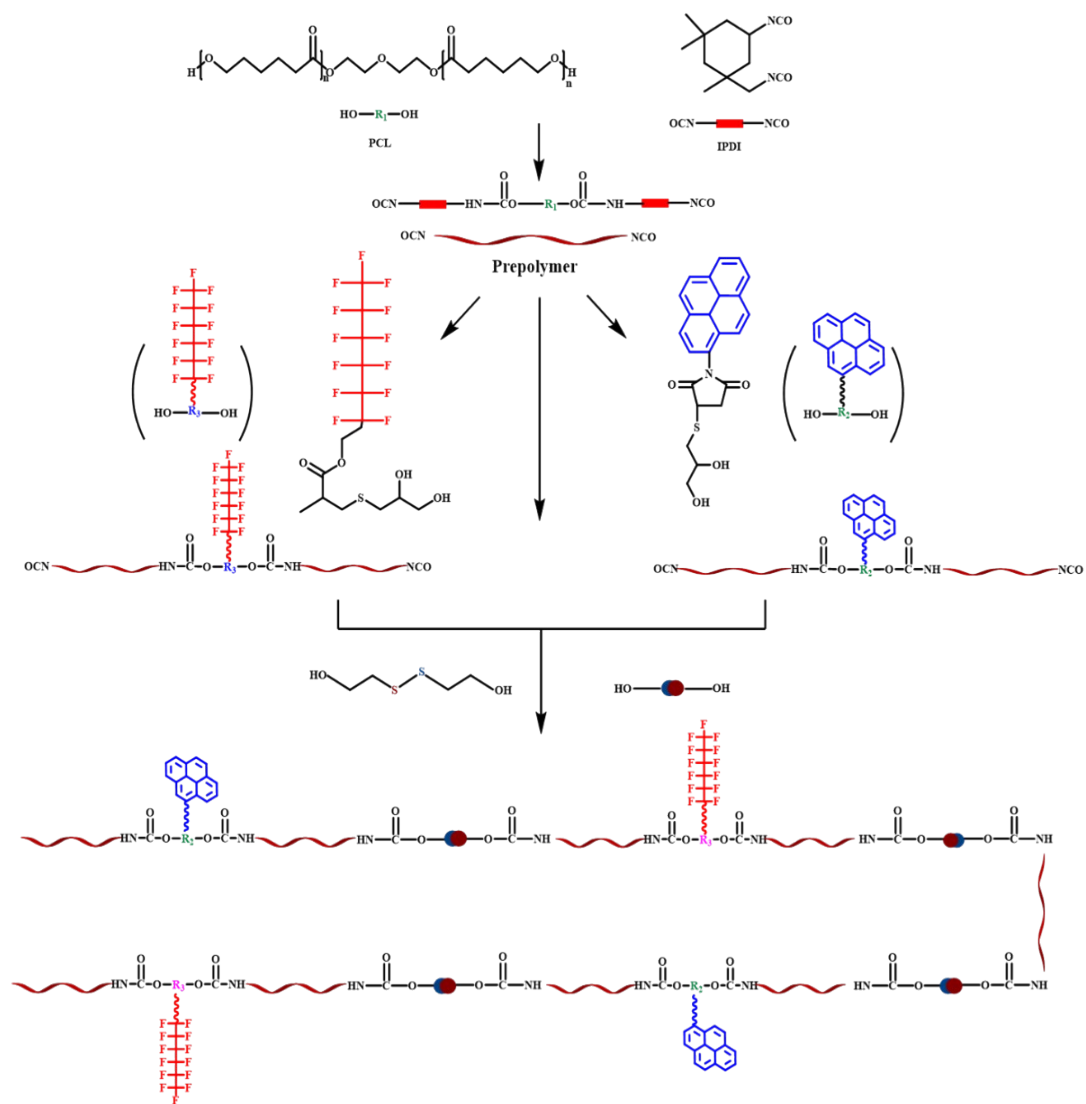

**Fig. S5** The synthetic route of MPU

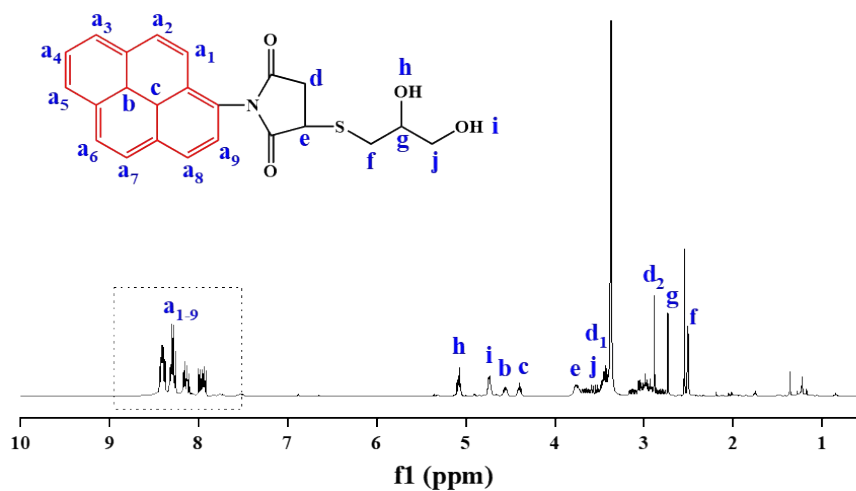

**Fig. S6** <sup>1</sup>H NMR spectrum of M-NPM

The signal distribution of M-NPM is as follows: <sup>1</sup>H NMR (400 MHz, DMSO)  $\delta$  8.56 (m, 6H), 8.31 (m, 5H), 8.1 (m, 4H), 8.09 (m, 5H), 5.12 (m, 4H), 4.89 (m, 3H), 4.55 (m, 3H), 4.40 (m, 3H), 3.76 (d,  $J = 5.4$  Hz, 3H), 3.61 (m, 3H), 3.43 (s, 4H), 2.89 (s, 4H), 2.73 (s, 4H), 2.51 (s, 3H).

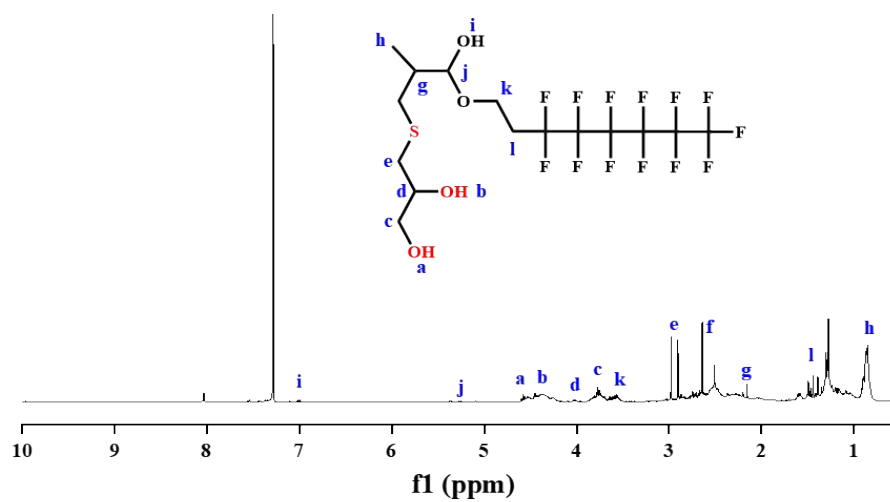

**Fig. S7**  $^1\text{H}$  NMR spectrum of M-PFM

The signal distribution of M-PFM is as follows:  $^1\text{H}$  NMR (400 MHz,  $\text{CDCl}_3$ )  $\delta$  6.71 (s, 3H), 4.58 (s, 5H), 4.44 (s, 4H), 4.02 (s, 3H), 3.78 (s, 2H), 3.57 (s, 4H), 2.98 (s, 2H), 2.64 (s, 4H), 2.16 (s, 2H), 1.28 (s, 8H), 0.85 (s, 2H).

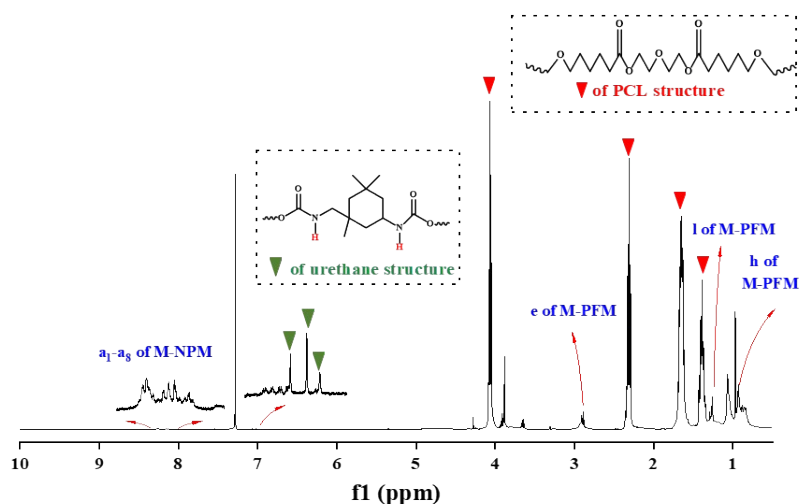

**Fig. S8** <sup>1</sup>H-NMR spectrum of MPU

In the case of MPU, the signal peaks of the protons attributed to the benzene ring in the polymer can be observed at 8.42-8.05 ppm, possibly due to the graft of pyrene groups. The weak peak at 7.20-6.91 ppm is the proton peak of N-H in urethane structure. A chemical shift of 4.50-2.36 ppm is assigned to the PCL protons. Resonances in the 1.28 ppm correspond to methylene proton attached to a difluorinated group (-CH<sub>2</sub>-CF<sub>2</sub>-) in the grafted M-PFM structure. The signals between 0.92 and 0.85 ppm mainly ascribe to the protons of methyl proton (CH<sub>3</sub>-) in grafted M-PFM. As well, the peaks around 2.93-2.89 ppm are resulted from the proton of the methylene group adjacent to the thioether group. The chemical shift of protons as described above confirmed the structural characteristics of MPU.

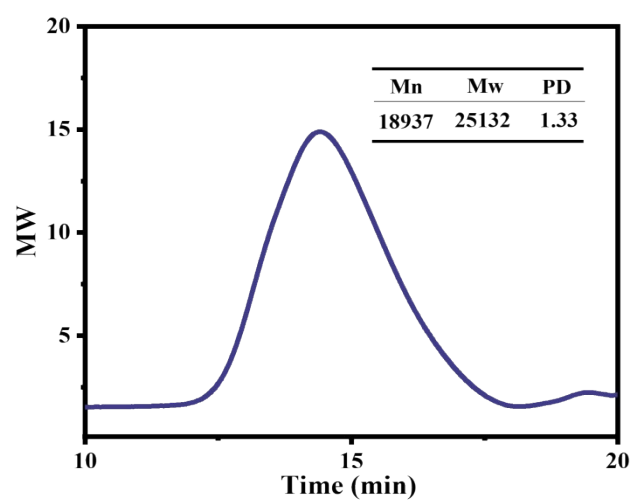

**Fig. S9** GPC curve of MPU

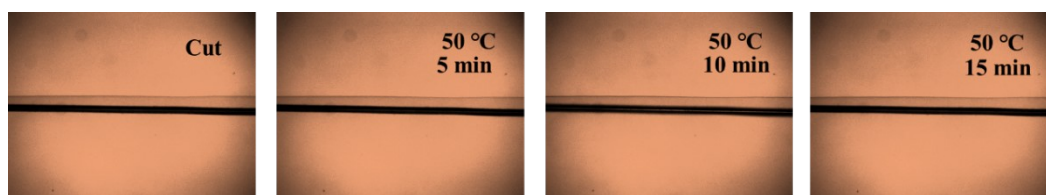

**Fig. S10** OM photos of cut control PU at 50°C

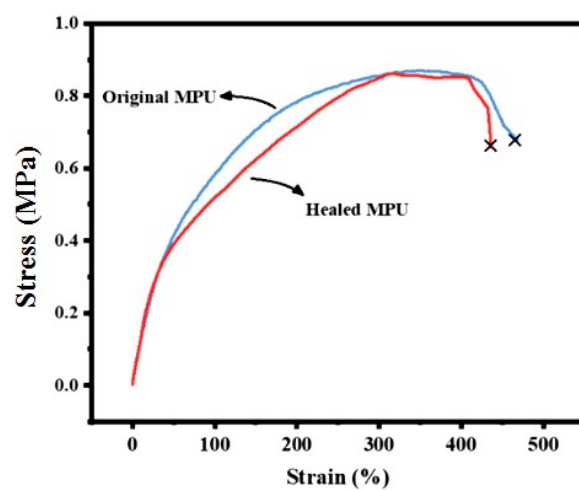

**Fig. S11** Stress-strain curves of pristine MPU and healed MPU

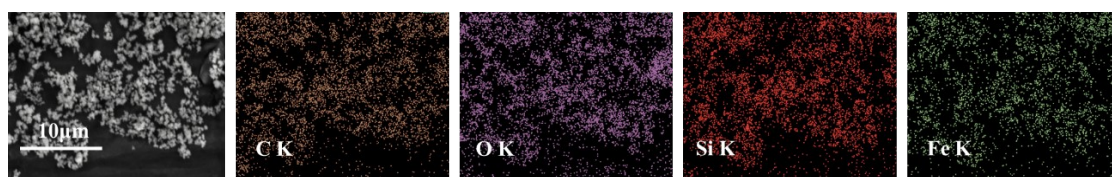

**Fig. S12** EDS mapping result of PMNs

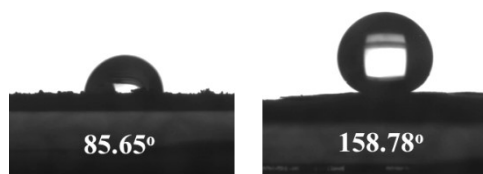

**Fig. S13** WCAs of graphene and fluorinate graphene tablets

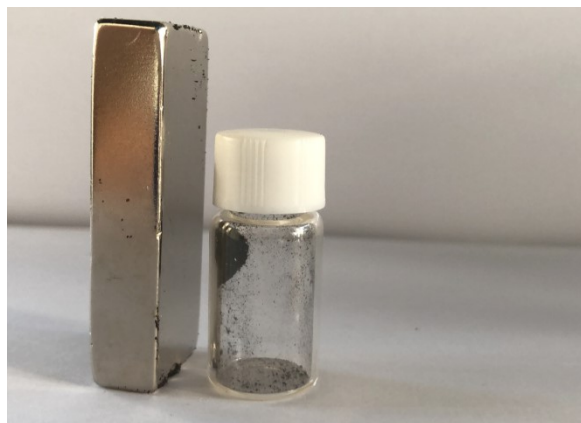

**Fig. S14** PMNs-FG attached to the bottle wall by a magnet

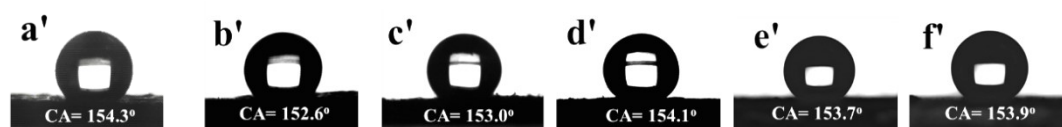

**Fig. S15** CAs of different liquids on the surface of PMNs-FG/MPU coating corresponding to Fig. 5a-f

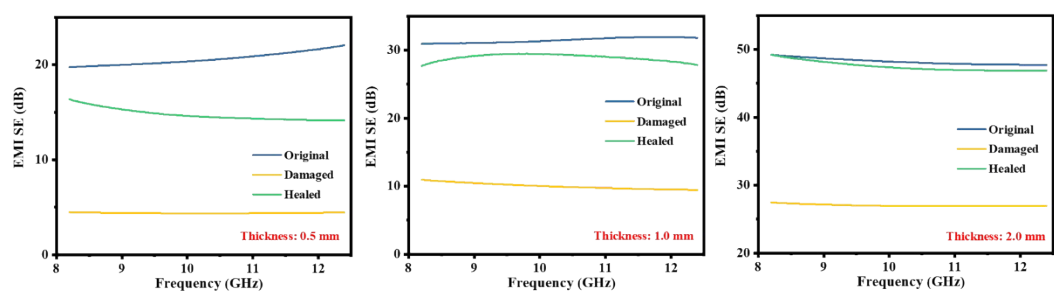

**Fig. S16** The EMI SE self-healing efficiency of MNs-FG/MPU films with different thickness

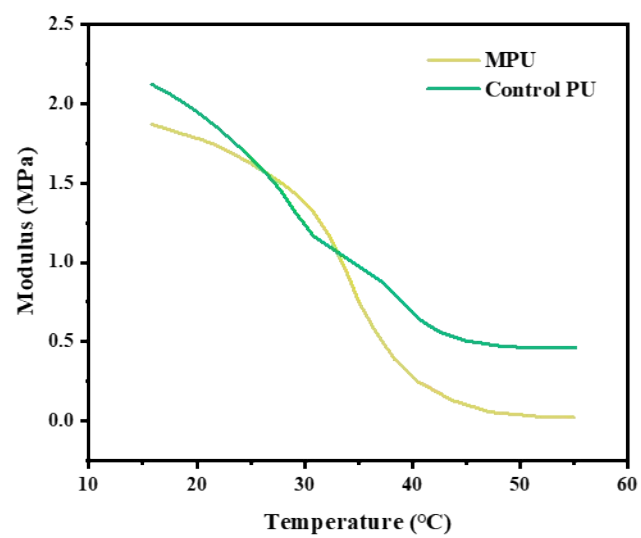

**Fig. S17** Dynamic mechanical analysis curves of MPU and the control PU

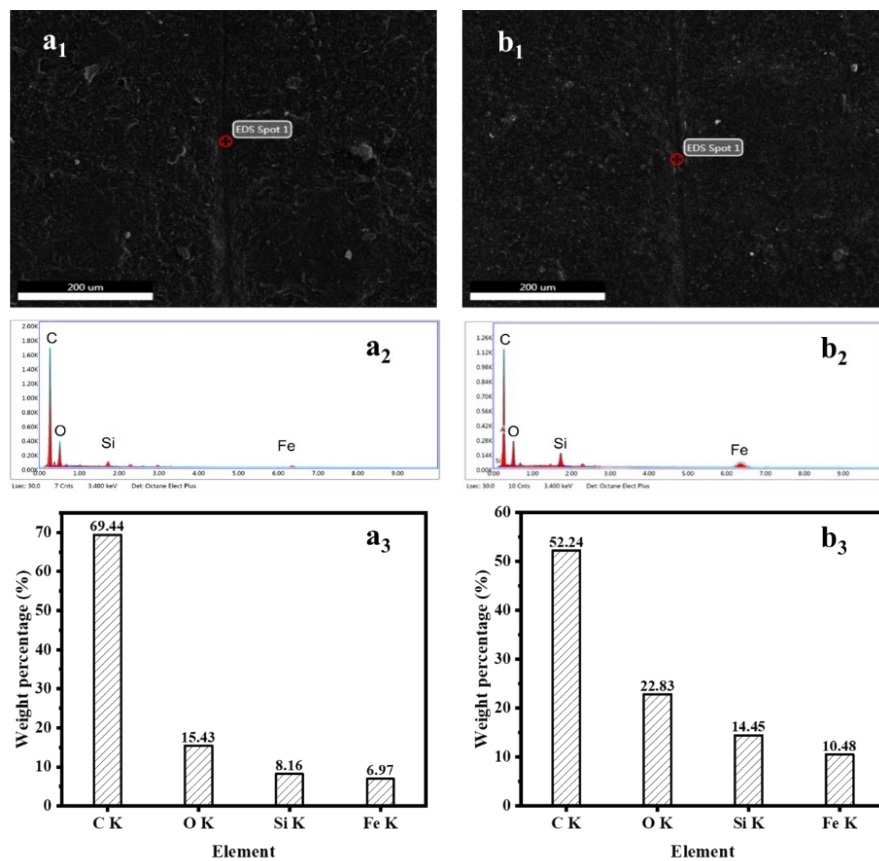

**Fig. S18** EDS spot analysis of (a) control PMNs-FG/PU coating (the control coating prepared by the self-healing PU without pyrene groups) and (b) PMNs-FG/MPU coating

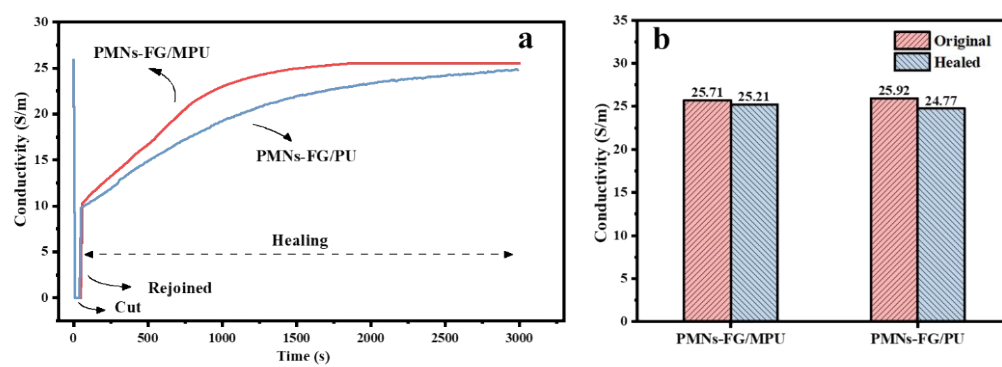

**Fig. S19** The conductivity of PMNs-FG/MPU and control PMNs-FG/PU during the healing process

**Tab. S1** Comparison of multi-functional composite materials reported in the literature

| Composite                                               | EMI<br>SE<br>(dB)           | Thickness<br>(mm)     | Tensile<br>strength | Self-cleaning<br>(WCA, °) | Self-healing<br>ability | Triggers<br>for healing              | Ref.         |
|---------------------------------------------------------|-----------------------------|-----------------------|---------------------|---------------------------|-------------------------|--------------------------------------|--------------|
| CNT-MLGEP foam<br>(0.0089 g cm <sup>-3</sup> )          | 66                          | 3.2                   | 0.043               | /                         | No                      | /                                    | 1            |
| rGO@MoS2@Fe <sub>3</sub> O <sub>4</sub>                 | 43.6                        | 5                     | 1.06                | /                         | Yes                     | Heat                                 | 2            |
| Silicone-coated M-<br>textile ( 150 S m <sup>-1</sup> ) | 20.5                        | 0.45                  | /                   | 126                       | No                      | /                                    | 3            |
| AgNW<br>aerogel/PDMS<br>composite                       | 45                          | 2                     | ~1                  | ~110                      | No                      | /                                    | 4            |
| CNT/Graphene/WPU                                        | 15                          | 0.35                  | 15                  | 95                        | No                      | /                                    | 5            |
| MXene/HEC/Silicon<br>composite                          | ~74                         | 2                     | 0.22                | 151.5                     | No                      | /                                    | 6            |
| MTMS-M/FG                                               | 34.6                        | 0.5                   | /                   | ~138                      | No                      | /                                    | 7            |
| MXene/PU@MS                                             | 20-90                       | 2                     | /                   | /                         | Yes                     | Force                                | 8            |
| CNT-PHEMA non-<br>woven fabric                          | 10-20                       | 2                     | 7.77                | /                         | Yes                     | Water<br>Vapor                       | 9            |
| PPyn@POTS Cotton<br>Fabric                              | 25                          | ~0.5                  | /                   | 153.8                     | Yes                     | Microwave                            | 10           |
| STF Label                                               | /                           | ~0.3                  | 0.2                 | 155                       | Yes                     | Heat                                 | 11           |
| NH <sub>2</sub> -MWCNTs/DA-<br>epoxy resin              | /                           | /                     | 22.5                | /                         | Yes                     | Heat/NIR<br>laser light              | 12           |
| PMNs-FG/MPU films                                       | ~20,<br>~30,<br>~50,<br>~80 | 0.5, 1.0,<br>2.0, 3.0 | 1.5                 | 154.3                     | Yes                     | Heat, Solar<br>light,<br>electricity | This<br>work |

## References

1. Q. Song, F. Ye, X. Yin, W. Li, H. Li, Y. Liu, K. Li, K. Xie, X. Li, Q. Fu, L. Cheng, L. Zhang, B. Wei, *Adv. Mater.*, 2017, **29**, 1701583.
2. A. V. Menon, B. Choudhury, G. Madras, S. Bose, *Chem. Eng. J.*, 2020, **382**, 122816.
3. Q.-W. Wang, H.-B. Zhang, J. Liu, S. Zhao, X. Xie, L. Liu, R. Yang, N. Koratkar, Z.-Z. Yu, *Adv. Funct. Mater.*, 2019, **29**, 1806819.
4. Z. Zeng, W. Li, N. Wu, S. Zhao, X. Lu, *ACS Appl. Mater. Interfaces*, 2020, **12**, 38584.
5. M. Dai, Y. Zhai, Y. Zhang, *Chem. Eng. J.*, 2021, **421**, 127749.
6. J. Huang, T. Wang, Y. m. Su, Y. Ding, C. Tu, W. Li, *Adv. Mater. Interfaces*, 2021, **8**, 2100186.
7. X. Jia, B. Shen, L. Zhang, W. Zheng, *Compos. B Eng.*, 2020, **198**, 108250.
8. W. Ma, W. Cai, W. Chen, P. Liu, J. Wang, Z. Liu, *Chem. Eng. J.*, 2021, **426**, 130729.
9. L. Chen, K. Guo, S.-L. Zeng, L. Xu, C.-Y. Xing, S. Zhang, B.-J. Li, *Carbon*, 2020, **162**, 445.
10. L. Zou, C. Lan, S. Zhang, X. Zheng, Z. Xu, C. Li, L. Yang, F. Ruan, S. C. Tan, *Nanomicro Lett.*, 2021, **13**, 190.
11. X. Su, H. Li, X. Lai, L. Zheng, Z. Chen, S. Zeng, K. Shen, L. Sun, X. Zeng, *ACS Appl. Mater. Interfaces*, 2020, **12**, 14578.
12. Q. Li, M. Jiang, G. Wu, L. Chen, S. Chen, Y. Cao, Y. Z. Wang, *ACS Appl. Mater. Interfaces*, 2017, **9**, 20797.
